# Supplementary material for: Deciphering Molecular Mechanisms Involved in Salinity Tolerance in Guar (Cyamopsis tetragonoloba (L.) Taub.) Using Transcriptome Analyses
Source: MDPI journal article supplement (doi:10.3390/plants11030291), 2022-01-22
Supplement: s1 [file s1]

**Table S1.** The experimental arrangement shows leaf and root samples from two guar genotypes ‘03 (Matador)’ (salt-tolerant) and ‘22 (PI 340261)’ (salt-sensitive) subjected to control and salt treatment

| Tissue | Replicates | Control        |                  | Salt treatment |                  |
|--------|------------|----------------|------------------|----------------|------------------|
|        |            | ‘03 (Matador)’ | ‘22 (PI 340261)’ | ‘03 (Matador)’ | ‘22 (PI 340261)’ |
| Leaf   | R1         | C03L1          | C22L1            | T03L1          | T22L1            |
|        | R2         | C03L2          | C22L2            | T03L2          | T22L2            |
|        | R3         | C03L3          | C22L3            | T03L3          | T22L3            |
| Root   | R1         | C03R1          | C22R1            | T03R1          | T22R1            |
|        | R2         | C03R2          | C22R2            | T03R2          | T22R2            |
|        | R3         | C03R3          | C22R3            | T03R3          | T22R3            |
